# Supplementary material
Source: publisher figshare collection journal article supplement (https://acs.figshare.com/ndownloader/files/6112380)
Supplement: Supplementary file 1 [file 6112380]

 
data_a 
 
_audit_creation_method            SHELXL-97 
_chemical_name_systematic 
; 
 ? 
; 
_chemical_name_common             ? 
_chemical_melting_point           ? 
_chemical_formula_moiety          ? 
_chemical_formula_sum  'C32 H30 Br2 N2 O Pt S' 
_chemical_formula_weight          845.55 
 
loop_ 
 _atom_type_symbol 
 _atom_type_description 
 _atom_type_scat_dispersion_real 
 _atom_type_scat_dispersion_imag 
 _atom_type_scat_source 
 'C'  'C'   0.0033   0.0016 
 'International Tables Vol C Tables 4.2.6.8 and 6.1.1.4' 
 'H'  'H'   0.0000   0.0000 
 'International Tables Vol C Tables 4.2.6.8 and 6.1.1.4' 
 'N'  'N'   0.0061   0.0033 
 'International Tables Vol C Tables 4.2.6.8 and 6.1.1.4' 
 'Br'  'Br'  -0.2901   2.4595 
 'International Tables Vol C Tables 4.2.6.8 and 6.1.1.4' 
 'Pt'  'Pt'  -1.7033   8.3905 
 'International Tables Vol C Tables 4.2.6.8 and 6.1.1.4' 
 'S'  'S'   0.1246   0.1234 
 'International Tables Vol C Tables 4.2.6.8 and 6.1.1.4' 
 'O'  'O'   0.0106   0.0060 
 'International Tables Vol C Tables 4.2.6.8 and 6.1.1.4' 
 
_symmetry_cell_setting            triclinic 
_symmetry_space_group_name_H-M    'P-1' 
 
loop_ 
 _symmetry_equiv_pos_as_xyz 
 'x, y, z' 
 '-x, -y, -z' 
 
_cell_length_a                    10.6084(7) 
_cell_length_b                    12.8660(8) 
_cell_length_c                    13.3514(9) 
_cell_angle_alpha                 61.360(4) 
_cell_angle_beta                  76.813(5) 
_cell_angle_gamma                 83.798(5) 
_cell_volume                      1557.17(18) 
_cell_formula_units_Z             2 
_cell_measurement_temperature     296(2) 
_cell_measurement_reflns_used     3365 
_cell_measurement_theta_min       2.43 
_cell_measurement_theta_max       22.91 
 
_exptl_crystal_description        block 
_exptl_crystal_colour             yellow 
_exptl_crystal_size_max           0.20 
_exptl_crystal_size_mid           0.15 
_exptl_crystal_size_min           0.15 
_exptl_crystal_density_meas       ? 
_exptl_crystal_density_diffrn     1.803 
_exptl_crystal_density_method     'not measured' 
_exptl_crystal_F_000              816 
_exptl_absorpt_coefficient_mu     7.166 
_exptl_absorpt_correction_type     'Multi-scan' 
_exptl_absorpt_correction_T_min   0.687
_exptl_absorpt_correction_T_max   0.738 
_exptl_absorpt_process_details    'SADABS (Sheldrick, 1996)' 
 
_exptl_special_details 
; 
 ? 
; 
 
_diffrn_ambient_temperature       296(2) 
_diffrn_radiation_wavelength      0.71073 
_diffrn_radiation_type            MoK\a 
_diffrn_radiation_source          'fine-focus sealed tube' 
_diffrn_radiation_monochromator   graphite 
_diffrn_measurement_device_type  'Bruker Smart APEX II'
_diffrn_measurement_method       'phi and omega scans'
_diffrn_detector_area_resol_mean  ? 
_diffrn_standards_number          ? 
_diffrn_standards_interval_count  ? 
_diffrn_standards_interval_time   ? 
_diffrn_standards_decay_%         ? 
_diffrn_reflns_number             10723 
_diffrn_reflns_av_R_equivalents   0.0296 
_diffrn_reflns_av_sigmaI/netI     0.0454 
_diffrn_reflns_limit_h_min        -12 
_diffrn_reflns_limit_h_max        12 
_diffrn_reflns_limit_k_min        -15 
_diffrn_reflns_limit_k_max        15 
_diffrn_reflns_limit_l_min        -15 
_diffrn_reflns_limit_l_max        15 
_diffrn_reflns_theta_min          1.80 
_diffrn_reflns_theta_max          25.00 
_reflns_number_total              5449 
_reflns_number_gt                 4645 
_reflns_threshold_expression      >2sigma(I) 
 
_computing_data_collection        'Bruker SMART' 
_computing_cell_refinement        'Bruker SMART' 
_computing_data_reduction         'Bruker SAINT' 
_computing_structure_solution     'SHELXS-97 (Sheldrick, 1990)' 
_computing_structure_refinement   'SHELXL-97 (Sheldrick, 1997)' 
_computing_molecular_graphics     'Bruker SHELXTL' 
_computing_publication_material   'Bruker SHELXTL' 
 
_refine_special_details 
; 
 Refinement of F^2^ against ALL reflections.  The weighted R-factor wR and 
 goodness of fit S are based on F^2^, conventional R-factors R are based 
 on F, with F set to zero for negative F^2^. The threshold expression of 
 F^2^ > 2sigma(F^2^) is used only for calculating R-factors(gt) etc. and is 
 not relevant to the choice of reflections for refinement.  R-factors based 
 on F^2^ are statistically about twice as large as those based on F, and R- 
 factors based on ALL data will be even larger. 
; 
 
_refine_ls_structure_factor_coef  Fsqd  
_refine_ls_matrix_type            full 
_refine_ls_weighting_scheme       calc  
_refine_ls_weighting_details 
 'calc w=1/[\s^2^(Fo^2^)+(0.0392P)^2^+0.0501P] where P=(Fo^2^+2Fc^2^)/3' 
_atom_sites_solution_primary      direct 
_atom_sites_solution_secondary    difmap 
_atom_sites_solution_hydrogens    geom 
_refine_ls_hydrogen_treatment     constr 
_refine_ls_extinction_method      none 
_refine_ls_extinction_coef        ? 
_refine_ls_number_reflns          5449 
_refine_ls_number_parameters      366 
_refine_ls_number_restraints      2 
_refine_ls_R_factor_all           0.0423 
_refine_ls_R_factor_gt            0.0325 
_refine_ls_wR_factor_ref          0.0775 
_refine_ls_wR_factor_gt           0.0730 
_refine_ls_goodness_of_fit_ref    1.017 
_refine_ls_restrained_S_all       1.066 
_refine_ls_shift/su_max           0.001 
_refine_ls_shift/su_mean          0.000 
 
loop_ 
 _atom_site_label 
 _atom_site_type_symbol 
 _atom_site_fract_x 
 _atom_site_fract_y 
 _atom_site_fract_z 
 _atom_site_U_iso_or_equiv 
 _atom_site_adp_type 
 _atom_site_occupancy 
 _atom_site_symmetry_multiplicity 
 _atom_site_calc_flag 
 _atom_site_refinement_flags 
 _atom_site_disorder_assembly 
 _atom_site_disorder_group 
C2 C 0.7352(6) 0.4882(6) 1.1717(6) 0.0648(17) Uani 1 1 d . . . 
H2 H 0.6782 0.4258 1.1992 0.078 Uiso 1 1 calc R . . 
C3 C 0.7508(6) 0.5344(6) 1.2424(5) 0.0594(16) Uani 1 1 d . . . 
Pt1 Pt 0.99943(2) 0.704518(18) 0.850814(19) 0.04394(9) Uani 1 1 d . . . 
Br2 Br 1.17664(7) 0.97929(6) 1.11503(7) 0.0679(2) Uani 1 1 d . . . 
C4 C 0.8374(6) 0.6262(5) 1.2008(5) 0.0556(15) Uani 1 1 d . . . 
H4 H 0.8476 0.6589 1.2474 0.067 Uiso 1 1 calc R . . 
N2 N 1.0622(4) 0.7950(4) 0.9232(4) 0.0455(11) Uani 1 1 d . . . 
N1 N 0.8897(4) 0.6242(4) 1.0188(4) 0.0458(11) Uani 1 1 d . . . 
C21 C 1.1070(6) 0.7919(5) 0.6952(6) 0.0521(15) Uani 1 1 d . . . 
C10 C 1.1480(5) 0.8829(5) 0.8685(6) 0.0545(15) Uani 1 1 d . . . 
H10 H 1.1856 0.9062 0.7907 0.065 Uiso 1 1 calc R . . 
C23 C 1.2461(5) 0.9285(5) 0.4890(5) 0.0473(14) Uani 1 1 d . . . 
C11 C 0.9263(6) 0.6097(5) 0.8001(5) 0.0535(15) Uani 1 1 d . . . 
C13 C 0.8024(7) 0.4669(5) 0.7640(5) 0.0547(15) Uani 1 1 d . . . 
C5 C 0.9080(5) 0.6677(4) 1.0886(5) 0.0427(12) Uani 1 1 d . . . 
C9 C 1.1841(6) 0.9416(6) 0.9222(6) 0.0600(17) Uani 1 1 d . . . 
H9 H 1.2436 1.0034 0.8814 0.072 Uiso 1 1 calc R . . 
C8 C 1.1293(6) 0.9054(5) 1.0363(5) 0.0495(14) Uani 1 1 d . . . 
C6 C 1.0044(5) 0.7620(5) 1.0364(5) 0.0428(12) Uani 1 1 d . . . 
C22 C 1.1708(6) 0.8529(5) 0.6009(5) 0.0515(14) Uani 1 1 d . . . 
C7 C 1.0376(5) 0.8165(5) 1.0949(5) 0.0492(14) Uani 1 1 d . . . 
H7 H 0.9986 0.7935 1.1723 0.059 Uiso 1 1 calc R . . 
C18 C 0.8524(6) 0.4266(5) 0.6817(6) 0.0588(16) Uani 1 1 d . . . 
H18 H 0.9349 0.4495 0.6360 0.071 Uiso 1 1 calc R . . 
C1 C 0.8050(6) 0.5358(5) 1.0613(5) 0.0548(15) Uani 1 1 d . . . 
H1 H 0.7937 0.5058 1.0128 0.066 Uiso 1 1 calc R . . 
C12 C 0.8748(6) 0.5449(5) 0.7794(5) 0.0556(15) Uani 1 1 d . . . 
C17 C 0.7790(7) 0.3532(5) 0.6692(6) 0.0626(17) Uani 1 1 d . . . 
H17 H 0.8137 0.3283 0.6137 0.075 Uiso 1 1 calc R . . 
C28 C 1.3800(6) 0.9276(6) 0.4655(6) 0.0625(16) Uani 1 1 d . . . 
H28 H 1.4231 0.8732 0.5231 0.075 Uiso 1 1 calc R . . 
C16 C 0.6590(7) 0.3156(5) 0.7335(6) 0.0630(17) Uani 1 1 d . . . 
C14 C 0.6818(8) 0.4300(6) 0.8282(6) 0.077(2) Uani 1 1 d . . . 
H14 H 0.6471 0.4563 0.8826 0.092 Uiso 1 1 calc R . . 
C15 C 0.6067(8) 0.3542(7) 0.8172(7) 0.084(2) Uani 1 1 d . . . 
H15 H 0.5247 0.3301 0.8637 0.101 Uiso 1 1 calc R . . 
C19 C 0.5805(9) 0.2359(7) 0.7163(7) 0.090(3) Uani 1 1 d . . . 
H19A H 0.5384 0.2850 0.6514 0.108 Uiso 1 1 calc R . . 
H19B H 0.6397 0.1838 0.6945 0.108 Uiso 1 1 calc R . . 
Br1' Br 0.65620(9) 0.47216(9) 1.39664(7) 0.1012(3) Uani 1 1 d . . . 
C24 C 1.1888(6) 1.0108(5) 0.3976(5) 0.0545(15) Uani 1 1 d . . . 
H24 H 1.0989 1.0135 0.4087 0.065 Uiso 1 1 calc R . . 
C25 C 1.2592(6) 1.0869(5) 0.2932(5) 0.0571(15) Uani 1 1 d . . . 
H25 H 1.2164 1.1413 0.2354 0.069 Uiso 1 1 calc R . . 
C26 C 1.3917(6) 1.0858(6) 0.2705(5) 0.0575(15) Uani 1 1 d . . . 
C27 C 1.4513(6) 1.0050(6) 0.3592(6) 0.0658(17) Uani 1 1 d . . . 
H27 H 1.5412 1.0028 0.3469 0.079 Uiso 1 1 calc R . . 
C20 C 0.4798(8) 0.1616(8) 0.8181(9) 0.112(3) Uani 1 1 d . . . 
H20A H 0.5192 0.1143 0.8842 0.168 Uiso 1 1 calc R . . 
H20B H 0.4402 0.1108 0.7999 0.168 Uiso 1 1 calc R . . 
H20C H 0.4152 0.2118 0.8360 0.168 Uiso 1 1 calc R . . 
C29 C 1.4693(8) 1.1732(6) 0.1568(6) 0.080(2) Uani 1 1 d D . . 
H29A H 1.5471 1.1348 0.1361 0.096 Uiso 1 1 calc R . . 
H29B H 1.4192 1.1979 0.0967 0.096 Uiso 1 1 calc R . . 
C30 C 1.5064(13) 1.2793(8) 0.1596(9) 0.198(8) Uani 1 1 d D . . 
H30A H 1.4324 1.3298 0.1575 0.297 Uiso 1 1 calc R . . 
H30B H 1.5736 1.3215 0.0932 0.297 Uiso 1 1 calc R . . 
H30C H 1.5373 1.2554 0.2297 0.297 Uiso 1 1 calc R . . 
O1 O 0.8150(6) 0.8002(5) 0.3175(4) 0.1026(18) Uani 1 1 d . . . 
C01 C 0.6666(9) 0.7119(9) 0.5492(8) 0.158(5) Uani 1 1 d . . . 
H01A H 0.5846 0.7196 0.5273 0.237 Uiso 1 1 calc R A 1 
H01B H 0.6562 0.7288 0.6134 0.237 Uiso 1 1 calc R A 1 
H01C H 0.6982 0.6326 0.5720 0.237 Uiso 1 1 calc RD A 1 
C02 C 0.9354(9) 0.8022(10) 0.4654(9) 0.120(3) Uani 1 1 d . . . 
H02A H 1.0080 0.8037 0.4067 0.180 Uiso 1 1 calc R B 1 
H02B H 0.9306 0.7262 0.5335 0.180 Uiso 1 1 calc R B 1 
H02C H 0.9458 0.8628 0.4853 0.180 Uiso 1 1 calc R B 1 
S1 S 0.7942(5) 0.8272(4) 0.4126(4) 0.0786(19) Uani 0.424(6) 1 d P C 1 
S1' S 0.8385(4) 0.7313(3) 0.4369(3) 0.0743(14) Uani 0.576(6) 1 d PD C 2 
 
loop_ 
 _atom_site_aniso_label 
 _atom_site_aniso_U_11 
 _atom_site_aniso_U_22 
 _atom_site_aniso_U_33 
 _atom_site_aniso_U_23 
 _atom_site_aniso_U_13 
 _atom_site_aniso_U_12 
C2 0.062(4) 0.058(4) 0.063(4) -0.018(4) -0.004(4) -0.022(3) 
C3 0.061(4) 0.058(4) 0.040(3) -0.010(3) -0.002(3) -0.008(3) 
Pt1 0.04831(15) 0.04246(14) 0.04054(14) -0.01856(11) -0.00899(10) -0.00254(9) 
Br2 0.0775(5) 0.0628(4) 0.0826(5) -0.0416(4) -0.0339(4) 0.0003(3) 
C4 0.060(4) 0.057(4) 0.049(4) -0.023(3) -0.014(3) 0.000(3) 
N2 0.049(3) 0.043(3) 0.044(3) -0.020(2) -0.007(2) -0.003(2) 
N1 0.048(3) 0.044(3) 0.042(3) -0.016(2) -0.010(2) -0.005(2) 
C21 0.061(4) 0.049(3) 0.052(4) -0.027(3) -0.017(3) 0.002(3) 
C10 0.042(3) 0.061(4) 0.056(4) -0.027(3) 0.000(3) -0.011(3) 
C23 0.049(4) 0.051(3) 0.050(4) -0.030(3) -0.009(3) 0.001(3) 
C11 0.062(4) 0.051(4) 0.047(4) -0.021(3) -0.018(3) 0.004(3) 
C13 0.073(5) 0.040(3) 0.047(4) -0.014(3) -0.018(3) -0.003(3) 
C5 0.047(3) 0.037(3) 0.041(3) -0.014(3) -0.011(3) -0.001(2) 
C9 0.047(4) 0.059(4) 0.081(5) -0.037(4) -0.010(3) -0.012(3) 
C8 0.050(4) 0.048(3) 0.058(4) -0.027(3) -0.019(3) 0.003(3) 
C6 0.046(3) 0.039(3) 0.042(3) -0.017(3) -0.014(3) 0.004(2) 
C22 0.053(4) 0.056(4) 0.042(4) -0.023(3) -0.003(3) -0.005(3) 
C7 0.056(4) 0.050(3) 0.040(3) -0.020(3) -0.010(3) -0.001(3) 
C18 0.064(4) 0.062(4) 0.055(4) -0.028(4) -0.016(3) -0.006(3) 
C1 0.061(4) 0.047(3) 0.051(4) -0.017(3) -0.011(3) -0.009(3) 
C12 0.069(4) 0.053(4) 0.051(4) -0.026(3) -0.022(3) 0.000(3) 
C17 0.080(5) 0.056(4) 0.062(4) -0.033(4) -0.025(4) 0.006(4) 
C28 0.056(4) 0.067(4) 0.056(4) -0.023(4) -0.013(3) 0.006(3) 
C16 0.079(5) 0.047(4) 0.063(4) -0.021(3) -0.021(4) -0.012(3) 
C14 0.098(6) 0.079(5) 0.063(5) -0.045(4) -0.002(4) -0.014(4) 
C15 0.078(5) 0.091(5) 0.085(6) -0.045(5) 0.008(4) -0.038(4) 
C19 0.119(7) 0.074(5) 0.091(6) -0.040(5) -0.034(5) -0.025(5) 
Br1' 0.1137(7) 0.1114(7) 0.0517(5) -0.0239(5) 0.0195(4) -0.0452(5) 
C24 0.044(3) 0.067(4) 0.053(4) -0.029(4) -0.005(3) -0.004(3) 
C25 0.066(4) 0.057(4) 0.045(4) -0.021(3) -0.012(3) 0.002(3) 
C26 0.059(4) 0.058(4) 0.049(4) -0.024(3) 0.003(3) -0.005(3) 
C27 0.047(4) 0.074(5) 0.065(5) -0.028(4) 0.001(3) -0.008(3) 
C20 0.080(6) 0.105(7) 0.151(9) -0.064(7) 0.004(6) -0.038(5) 
C29 0.087(6) 0.069(5) 0.058(5) -0.016(4) 0.006(4) -0.011(4) 
C30 0.33(2) 0.126(10) 0.105(9) -0.053(8) 0.084(11) -0.139(12) 
O1 0.137(5) 0.118(5) 0.054(3) -0.042(3) -0.004(3) -0.032(4) 
C01 0.155(11) 0.194(12) 0.116(9) -0.075(10) -0.041(8) 0.080(10) 
C02 0.104(7) 0.170(10) 0.123(8) -0.100(8) -0.020(6) -0.002(7) 
S1 0.113(4) 0.060(4) 0.062(3) -0.029(2) -0.020(3) 0.008(3) 
S1' 0.092(3) 0.071(3) 0.060(2) -0.0351(19) -0.0055(18) -0.0023(19) 
 
_geom_special_details 
; 
 All esds (except the esd in the dihedral angle between two l.s. planes) 
 are estimated using the full covariance matrix.  The cell esds are taken 
 into account individually in the estimation of esds in distances, angles 
 and torsion angles; correlations between esds in cell parameters are only 
 used when they are defined by crystal symmetry.  An approximate (isotropic) 
 treatment of cell esds is used for estimating esds involving l.s. planes. 
; 
 
loop_ 
 _geom_bond_atom_site_label_1 
 _geom_bond_atom_site_label_2 
 _geom_bond_distance 
 _geom_bond_site_symmetry_2 
 _geom_bond_publ_flag 
C2 C1 1.353(9) . ? 
C2 C3 1.379(8) . ? 
C3 C4 1.386(9) . ? 
C3 Br1' 1.881(6) . ? 
Pt1 C11 1.946(6) . ? 
Pt1 C21 1.959(7) . ? 
Pt1 N2 2.066(4) . ? 
Pt1 N1 2.074(5) . ? 
Br2 C8 1.887(5) . ? 
C4 C5 1.378(8) . ? 
N2 C10 1.330(7) . ? 
N2 C6 1.364(7) . ? 
N1 C1 1.339(7) . ? 
N1 C5 1.351(6) . ? 
C21 C22 1.200(8) . ? 
C10 C9 1.393(8) . ? 
C23 C28 1.384(8) . ? 
C23 C24 1.392(8) . ? 
C23 C22 1.431(8) . ? 
C11 C12 1.207(7) . ? 
C13 C14 1.355(9) . ? 
C13 C18 1.405(8) . ? 
C13 C12 1.441(8) . ? 
C5 C6 1.461(8) . ? 
C9 C8 1.361(9) . ? 
C8 C7 1.379(8) . ? 
C6 C7 1.390(7) . ? 
C18 C17 1.378(8) . ? 
C17 C16 1.353(9) . ? 
C28 C27 1.377(9) . ? 
C16 C15 1.411(10) . ? 
C16 C19 1.516(8) . ? 
C14 C15 1.402(9) . ? 
C19 C20 1.488(12) . ? 
C24 C25 1.354(9) . ? 
C25 C26 1.369(8) . ? 
C26 C27 1.379(9) . ? 
C26 C29 1.497(9) . ? 
C29 C30 1.480(8) . ? 
O1 S1 1.435(6) . ? 
O1 S1' 1.472(6) . ? 
C01 S1 2.019(10) . ? 
C01 S1' 2.033(9) . ? 
C02 S1' 1.658(9) . ? 
C02 S1 1.733(9) . ? 
 
loop_ 
 _geom_angle_atom_site_label_1 
 _geom_angle_atom_site_label_2 
 _geom_angle_atom_site_label_3 
 _geom_angle 
 _geom_angle_site_symmetry_1 
 _geom_angle_site_symmetry_3 
 _geom_angle_publ_flag 
C1 C2 C3 118.3(6) . . ? 
C2 C3 C4 120.3(6) . . ? 
C2 C3 Br1' 120.3(5) . . ? 
C4 C3 Br1' 119.4(5) . . ? 
C11 Pt1 C21 90.8(2) . . ? 
C11 Pt1 N2 173.3(2) . . ? 
C21 Pt1 N2 95.9(2) . . ? 
C11 Pt1 N1 94.4(2) . . ? 
C21 Pt1 N1 174.66(18) . . ? 
N2 Pt1 N1 78.89(17) . . ? 
C5 C4 C3 118.1(5) . . ? 
C10 N2 C6 118.8(5) . . ? 
C10 N2 Pt1 126.1(4) . . ? 
C6 N2 Pt1 115.0(3) . . ? 
C1 N1 C5 119.2(5) . . ? 
C1 N1 Pt1 125.7(4) . . ? 
C5 N1 Pt1 115.0(4) . . ? 
C22 C21 Pt1 175.1(5) . . ? 
N2 C10 C9 123.0(6) . . ? 
C28 C23 C24 115.7(6) . . ? 
C28 C23 C22 122.4(6) . . ? 
C24 C23 C22 121.9(5) . . ? 
C12 C11 Pt1 173.8(6) . . ? 
C14 C13 C18 117.2(6) . . ? 
C14 C13 C12 120.9(6) . . ? 
C18 C13 C12 121.9(6) . . ? 
N1 C5 C4 121.2(5) . . ? 
N1 C5 C6 115.8(5) . . ? 
C4 C5 C6 123.0(5) . . ? 
C8 C9 C10 117.7(6) . . ? 
C9 C8 C7 120.7(5) . . ? 
C9 C8 Br2 119.8(4) . . ? 
C7 C8 Br2 119.4(5) . . ? 
N2 C6 C7 120.7(5) . . ? 
N2 C6 C5 115.3(4) . . ? 
C7 C6 C5 124.1(5) . . ? 
C21 C22 C23 178.3(6) . . ? 
C8 C7 C6 118.9(5) . . ? 
C17 C18 C13 119.8(7) . . ? 
N1 C1 C2 122.7(5) . . ? 
C11 C12 C13 174.2(7) . . ? 
C16 C17 C18 123.2(6) . . ? 
C27 C28 C23 121.8(6) . . ? 
C17 C16 C15 118.1(6) . . ? 
C17 C16 C19 121.7(6) . . ? 
C15 C16 C19 120.2(7) . . ? 
C13 C14 C15 123.6(6) . . ? 
C14 C15 C16 118.1(7) . . ? 
C20 C19 C16 116.2(7) . . ? 
C25 C24 C23 122.4(6) . . ? 
C24 C25 C26 121.7(6) . . ? 
C25 C26 C27 117.3(6) . . ? 
C25 C26 C29 121.6(6) . . ? 
C27 C26 C29 121.0(6) . . ? 
C28 C27 C26 121.2(6) . . ? 
C30 C29 C26 113.1(6) . . ? 
S1 O1 S1' 48.2(3) . . ? 
S1 C01 S1' 34.1(2) . . ? 
S1' C02 S1 40.9(3) . . ? 
O1 S1 C02 109.7(5) . . ? 
O1 S1 C01 110.2(5) . . ? 
C02 S1 C01 103.8(5) . . ? 
O1 S1' C02 111.9(5) . . ? 
O1 S1' C01 107.9(4) . . ? 
C02 S1' C01 106.1(5) . . ? 
 
_diffrn_measured_fraction_theta_max    0.993 
_diffrn_reflns_theta_full              25.00 
_diffrn_measured_fraction_theta_full   0.993 
_refine_diff_density_max    1.502 
_refine_diff_density_min   -1.171 
_refine_diff_density_rms    0.102 
